# Supplementary material for: UV-excited single-component white phosphor of Lu2WO6 with broad-band emission for pc-WLED
Source: Royal Society of Chemistry journal article supplement (doi:10.1039/d3dt00692a), 2023-01-01
Supplement: d3dt00692a1.pdf [file d3dt00692a1.pdf]

### UV-excited Single-component White Phosphor of $\text{Lu}_2\text{WO}_6$ with Broad-band Emission for pc-WLED

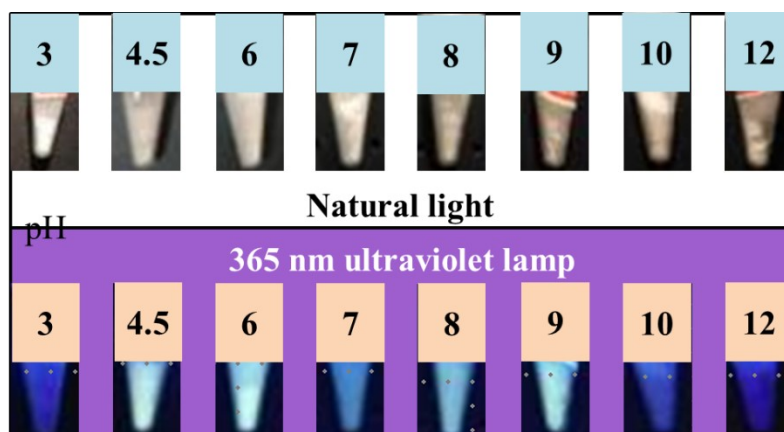

Figure S1. Photographs of all samples under the natural light and ultraviolet lamp

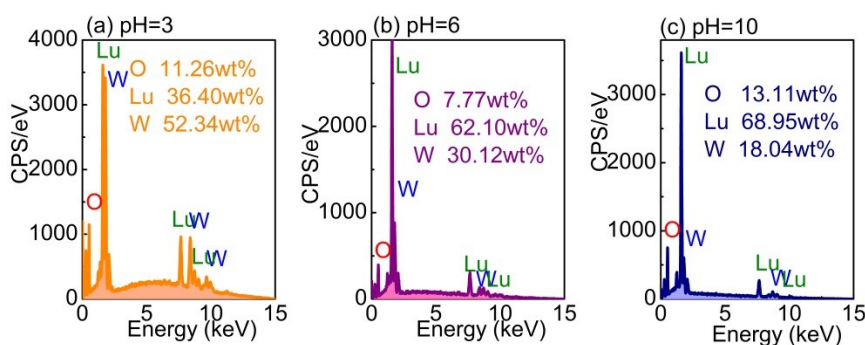

Figure S2 Element atomic percentage of three typical lutetium tungstate synthesized at pH value of (a) 3, (b) 6, and (c) 10.

Table S1 Detail Raman peak sites of eight samples synthesized at different pH environments

| pH=3 | 4.5                              | 6                                | 7   | 8                                | 9                                | 10  | 12  |
|------|----------------------------------|----------------------------------|-----|----------------------------------|----------------------------------|-----|-----|
| 359  | 197                              | 135                              | 194 | 195                              | 137                              | 103 | 104 |
| 828  | 253( $\text{La}_2\text{MoO}_6$ ) | 195                              | 283 | 283                              | 194                              | 125 | 141 |
| 985  | 311                              | 284                              | 312 | 312                              | 284                              | 139 | 198 |
|      | 368                              | 312                              | 370 | 370                              | 312                              | 194 | 246 |
|      | 430                              | 370                              | 396 | 397                              | 370                              | 283 | 282 |
|      | 484                              | 396                              | 435 | 435                              | 396                              | 311 | 320 |
|      | 531                              | 436                              | 479 | 478                              | 435                              | 371 | 393 |
|      | 625                              | 478                              | 530 | 501                              | 478                              | 437 | 474 |
|      | 715                              | 501                              | 631 | 530                              | 501                              | 478 | 550 |
|      | 752                              | 529                              | 711 | 636                              | 530                              | 546 | 628 |
|      | 841                              | 563                              | 752 | 711                              | 563                              | 628 | 656 |
|      | 949                              | 638                              | 842 | 752                              | 633                              | 703 | 701 |
|      |                                  | 711                              |     | 841                              | 711                              | 775 | 755 |
|      |                                  | 752                              |     | 900( $\text{La}_2\text{MoO}_6$ ) | 752                              | 814 | 812 |
|      |                                  | 841                              |     |                                  | 841                              | 841 |     |
|      |                                  | 898( $\text{La}_2\text{MoO}_6$ ) |     |                                  | 900( $\text{La}_2\text{MoO}_6$ ) | 915 |     |

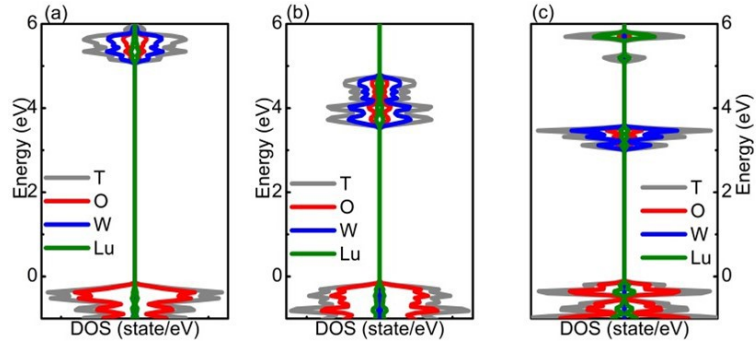

Figure S3. Density of states of (a)  $\text{Lu}_2\text{W}_3\text{O}_{12}$ , (b)  $\text{Lu}_2\text{WO}_6$ , and (c)  $\text{Lu}_6\text{WO}_{12}$ .

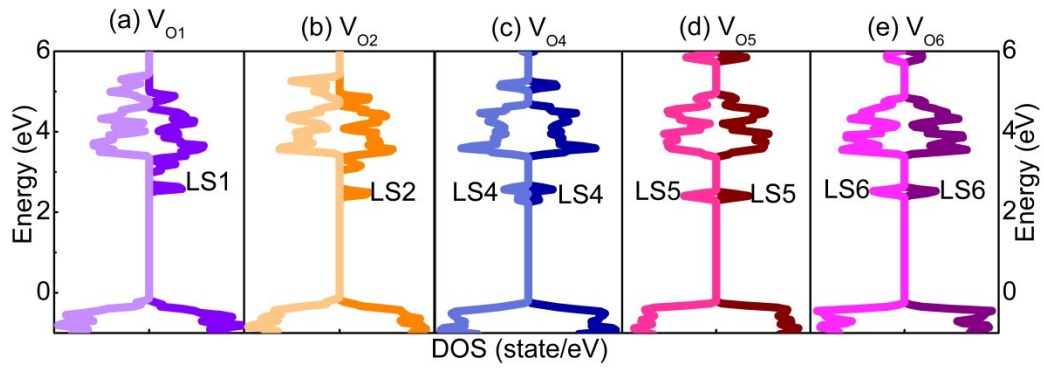

Figure S4. Density of state for (a)  $\text{V}_{01}$ , (b)  $\text{V}_{02}$ , (c)  $\text{V}_{04}$ , (d)  $\text{V}_{05}$ , and (e)  $\text{V}_{06}$  models
